# Supplementary material for: Effect of the solvent on the morphology of sulfamerazine crystals and its molecular mechanism
Source: Royal Society of Chemistry journal article supplement (doi:10.1039/d1ce00667c), 2022-01-01
Supplement: d1ce00667c1.pdf [file d1ce00667c1.pdf]

## Electronic Supplementary Information

### **The effect of solvents on morphology of sulfamerazine crystals and its molecular mechanism**

Liang Li,<sup>a</sup> Xiongtao Ji,<sup>a</sup> Xiaowei Cheng,<sup>a</sup> Danning Li,<sup>a</sup> Ting Wang,<sup>\*ab</sup> Xin Huang,<sup>ab</sup> Na Wang,<sup>ab</sup> Qiuxiang Yin<sup>ab</sup> and Hongxun Hao<sup>\*abc</sup>

<sup>a</sup> School of Chemical Engineering and Technology, Tianjin University, Tianjin, 300072, China.

<sup>b</sup> Collaborative Innovation Center of Chemical Science and Engineering (Tianjin), Tianjin University, Tianjin, 300072, China.

<sup>c</sup> School of Chemical Engineering and Technology, Hainan University, Haikou, 570208, China.

Table S1. Crystal habit relevant parameters of SMR in different solvents calculated by the MAE model.

| Solvent        | Faces | $E_{tot}$ | $E_{sol}$ | $E_{sur}$ | $E_{int}$ | $E_s$   | $E_{att'}$ | $R'_{hkl}$ | Area/% |
|----------------|-------|-----------|-----------|-----------|-----------|---------|------------|------------|--------|
| Water          | 001   | -1950.03  | -2687.92  | 15276.45  | -70.92    | -81.46  | 24.15      | 1.80       | 32.35  |
|                | 011   | -1464.03  | -2210.50  | 30769.23  | -146.45   | -220.12 | 133.75     | 9.95       | --     |
|                | 100   | -1763.75  | -2979.97  | 15297.41  | -68.69    | -67.11  | -13.44     | 1.00       | 58.52  |
|                | 110   | -1470.35  | -2181.99  | 30706.93  | -146.32   | -200.20 | 105.99     | 7.89       | --     |
|                | 201   | -1445.88  | -2176.76  | 30666.00  | -146.02   | -163.67 | 79.83      | 5.94       | --     |
|                | 111   | -1221.46  | -2130.96  | 30675.46  | -145.20   | -194.48 | 96.20      | 7.16       | 9.13   |
| Methanol       | 001   | 45.78     | -1228.19  | 15276.46  | -68.30    | -78.46  | 21.14      | 1.50       | 36.25  |
|                | 011   | 629.10    | -647.39   | 15297.41  | -143.87   | -216.23 | 129.86     | 6.14       | --     |
|                | 100   | 326.67    | -1028.10  | 30769.23  | -68.01    | -66.45  | -14.10     | 1.00       | 54.32  |
|                | 110   | 612.86    | -626.89   | 30706.93  | -143.74   | -196.68 | 102.47     | 7.27       | --     |
|                | 201   | 649.37    | -645.23   | 30666.00  | -143.28   | -160.58 | 76.75      | 5.44       | --     |
|                | 111   | 1024.75   | -655.74   | 30675.47  | 141.44    | -189.44 | 91.16      | 6.47       | 9.43   |
| Ethanol        | 001   | -2707.99  | -4610.44  | 15276.46  | -65.24    | -74.94  | 17.62      | 1.08       | 43.56  |
|                | 011   | -2097.15  | -3910.46  | 30769.23  | -141.25   | -212.30 | 125.93     | 7.73       | --     |
|                | 100   | -2500.78  | -4316.22  | 15297.41  | -65.77    | -64.26  | -16.30     | 1.00       | 46.43  |
|                | 110   | -1813.32  | -3983.89  | 30706.93  | -139.20   | -190.46 | 96.25      | 5.90       | --     |
|                | 201   | -2068.39  | -3867.28  | 30666.00  | -140.82   | -157.83 | 73.99      | 4.54       | --     |
|                | 111   | -1395.66  | -3869.23  | 30675.47  | -137.58   | -184.26 | 85.98      | 5.27       | 10.01  |
| Isopropanol    | 001   | -6242.42  | -8673.56  | 15276.46  | -62.66    | -71.97  | 14.66      | 1.00       | 51.23  |
|                | 011   | -5425.10  | -7813.81  | 30769.23  | -138.44   | -208.08 | 121.71     | 8.30       | --     |
|                | 100   | -5895.27  | -8284.95  | 15297.41  | -62.96    | -61.52  | -19.04     | 1.30       | 38.24  |
|                | 110   | -5417.72  | -7762.15  | 30706.93  | -138.36   | -189.30 | 95.09      | 6.49       | --     |
|                | 201   | -5392.89  | -7751.80  | 30666.00  | -138.08   | -154.77 | 70.93      | 4.84       | --     |
|                | 111   | -4389.31  | -7722.84  | 30675.47  | -133.38   | -178.64 | 80.36      | 5.48       | 10.53  |
| Methyl acetate | 001   | -1921.47  | -4137.82  | 15276.46  | -63.71    | -73.18  | 15.86      | 1.00       | 48.29  |
|                | 011   | -1002.13  | -3140.23  | 30769.23  | -139.66   | -209.92 | 123.54     | 7.79       | --     |
|                | 100   | -1425.94  | -3630.98  | 15297.41  | -63.87    | -62.40  | -18.16     | 1.15       | 41.14  |
|                | 110   | -927.34   | -3059.89  | 30706.93  | -139.39   | -190.72 | 96.51      | 6.09       | --     |
|                | 201   | -942.88   | -3101.64  | 30666.00  | -139.06   | -155.86 | 72.03      | 4.54       | --     |
|                | 111   | 88.98     | -3052.34  | 30675.47  | -134.31   | -179.80 | 81.62      | 5.15       | 10.57  |
| Ethyl acetate  | 001   | -3366.44  | -6139.06  | 15276.46  | -60.99    | -70.06  | 12.74      | 1.00       | 56.29  |
|                | 011   | -2819.01  | -5537.94  | 30769.23  | -136.83   | -205.66 | 119.29     | 9.36       | --     |
|                | 100   | -3516.80  | -6263.74  | 15297.41  | -61.22    | -59.82  | -20.74     | 1.63       | 33.12  |
|                | 110   | -2769.81  | -5476.85  | 30706.93  | -136.58   | -186.88 | 92.67      | 7.27       | --     |
|                | 201   | -2718.63  | -5405.42  | 30666.00  | -136.48   | -152.97 | 69.14      | 5.43       | --     |
|                | 111   | -1474.66  | -5394.36  | 30675.47  | -130.52   | -174.81 | 76.53      | 6.01       | 10.59  |
| Butyl acetate  | 001   | 7231.33   | 3811.20   | 15276.46  | -57.84    | -66.43  | 9.12       | 1.00       | 67.63  |
|                | 011   | -2617.52  | -6457.13  | 30769.23  | -131.36   | -197.44 | 111.07     | 12.18      | --     |
|                | 100   | -3218.05  | -7115.37  | 15297.41  | -55.61    | -54.33  | -26.22     | 2.88       | 21.57  |
|                | 110   | -2532.20  | -6320.33  | 30706.93  | -131.31   | -179.67 | 85.46      | 9.37       | --     |

---

|     |          |          |          |         |         |       |      |       |
|-----|----------|----------|----------|---------|---------|-------|------|-------|
| 201 | -2470.33 | -6296.31 | 30666.00 | -130.93 | -146.74 | 62.91 | 6.90 | --    |
| 111 | -706.64  | -6231.03 | 30675.47 | -122.69 | -164.33 | 66.05 | 7.24 | 10.80 |

---

All energies are in  $\text{kcal}\cdot\text{mol}^{-1}$ .

---

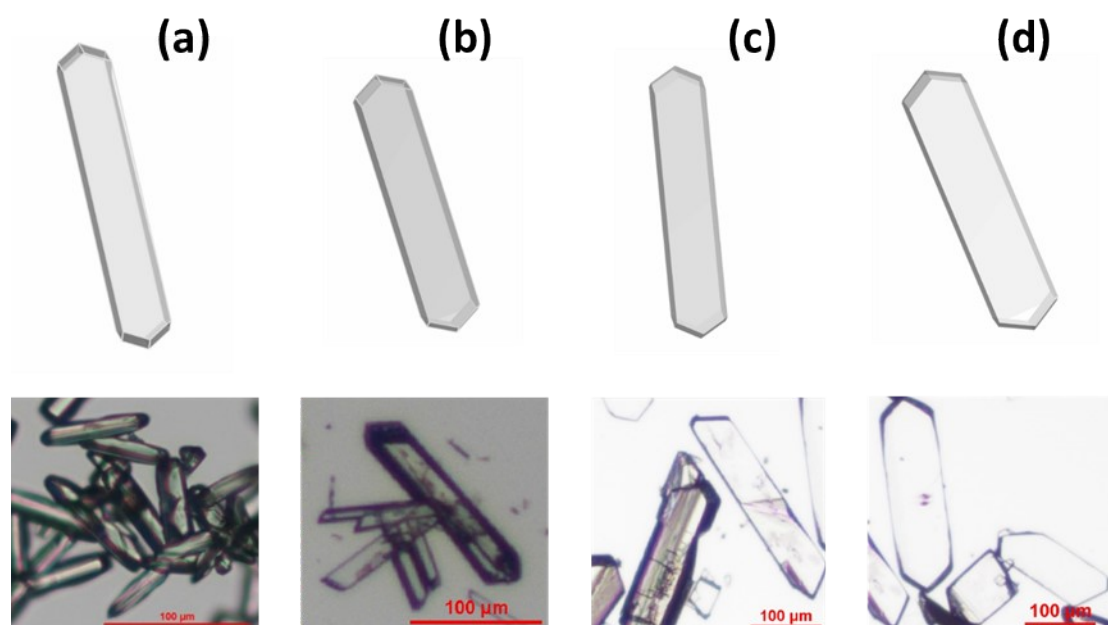

Fig S1. The modified morphology predicted in ethanol (a), isopropanol (b), methyl acetate (c) and ethyl acetate (d) with MAE model.

---

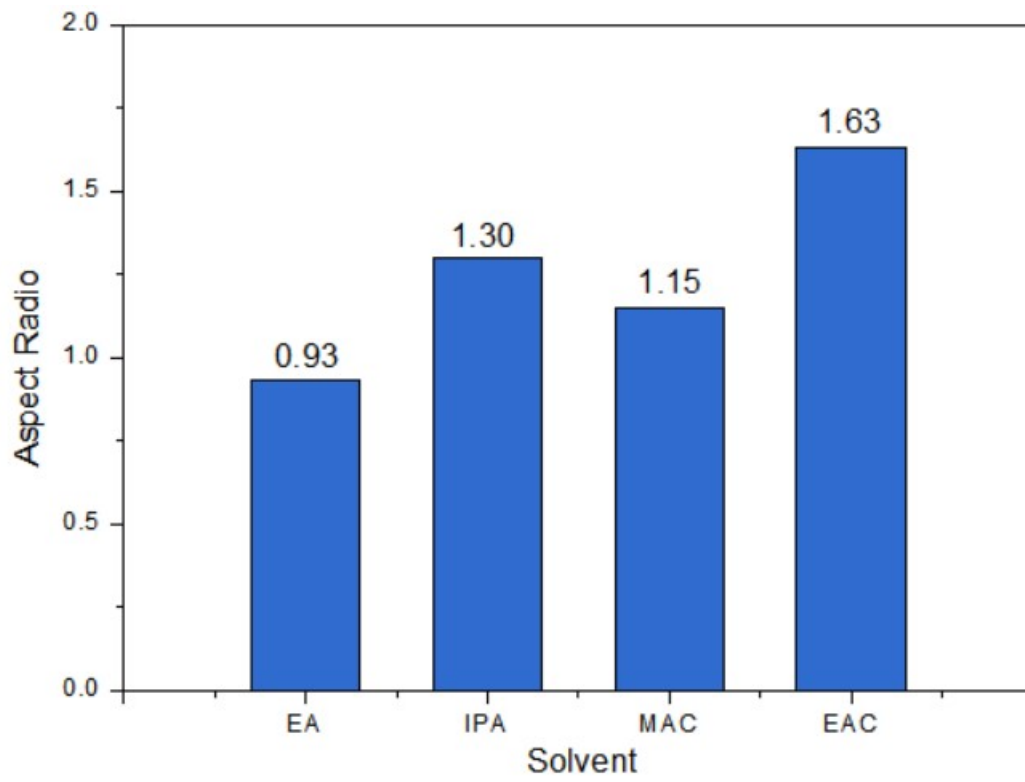

Fig S2. The simulated aspect ratios of SMR crystals in ethanol, isopropanol, methyl acetate and ethyl acetate.

---

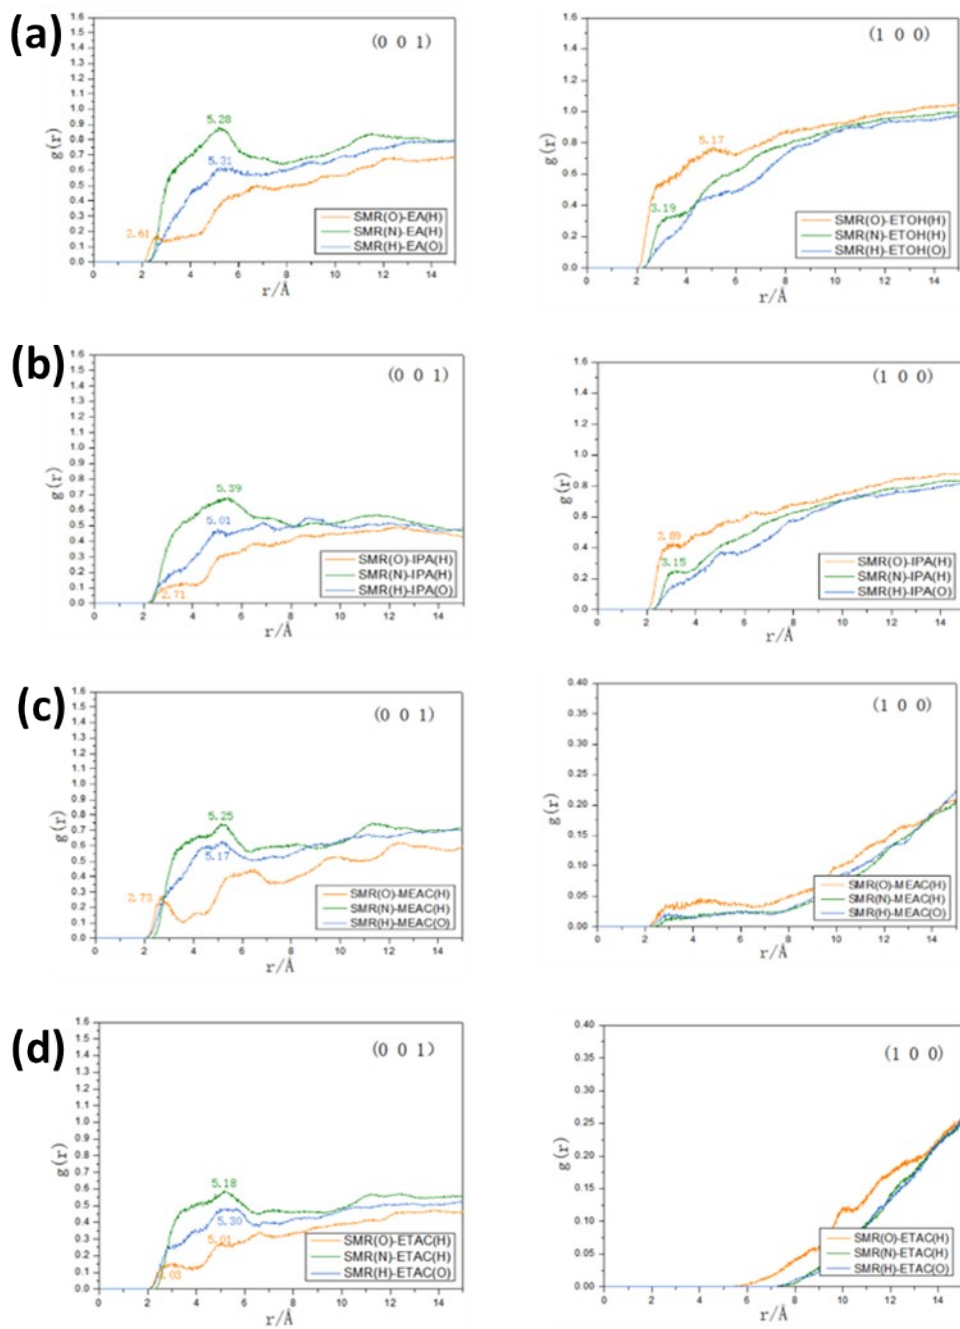

Fig S3. The RDF curves of (a)ethanol, (b)isopropanol, (c) methyl acetate and (d)ethyl acetate with (0 0 1) (left) and (1 0 0) (right) faces. Black, red, and blue lines represent the interactions of SMR(O)-solvent (H), SMR (N)-solvent (H), and solute (H)-solvent (O), respectively.

## Model size convergence

The model dimension can dramatically influence  $E_s$ , which significantly affects the final predicted morphology. And it is well known that the larger the model dimension, the more accurate the result will be. This is because for the non-bonding interactions, the molecules in the model may be affected by the mirror self-molecules in the mirror periodic box. But if the model dimension is too large, the simulation time will inevitably increase, and the accuracy will not increase significantly. Therefore, it is a crucial step to find an appropriate model dimension to meet the accuracy and to consume less time. In this study, the model size was validated by the controlled variable method, and the effects of crystal surface layer thickness ( $t_c$ ), solvent layer thickness ( $t_s$ ) or the number of solvent molecules, vacuum layer thickness ( $t_v$ ) and the length (U) and width (V) of the supercell on  $E_s$  were investigated one by one. Additionally, when constructing the amorphous cell of the solvent, the NVT ensemble was first used for the production of the solvent phase with 500 ps simulation time, and then the NPT ensemble was applied for the equilibration of the solvent phase with 500 ps. Taking the (0 0 1) surface of SMR as an example, the procedures are summarized in Fig. S4, and the calculated  $E_s$  values affected by the model dimension are summarized in Table S4 and Fig. S5~S11.

The simulation results illustrate that with the increase in  $t_c$ ,  $t_s$ ,  $t_v$ , U and V, the  $E_s$  values decrease (or increase) rapidly initially and then remain almost constant.

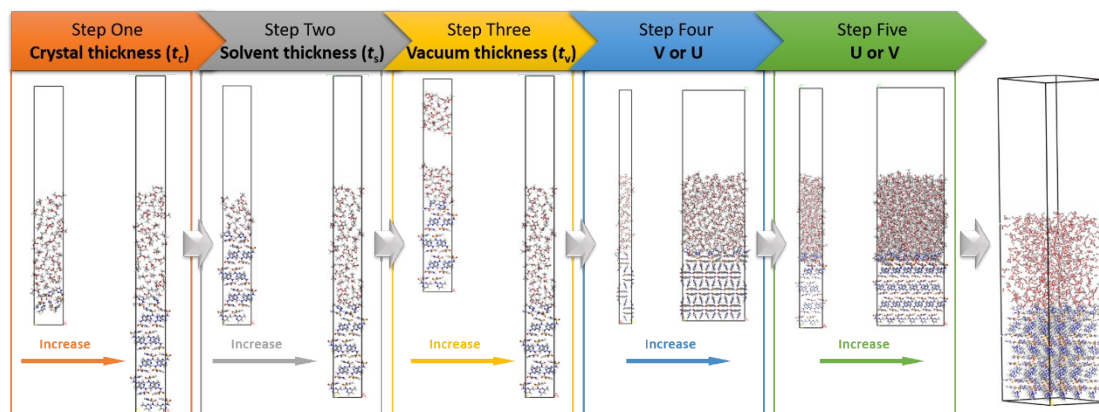

Fig. S4 The investigation procedure of the effect of model dimension on the  $E_s$ .

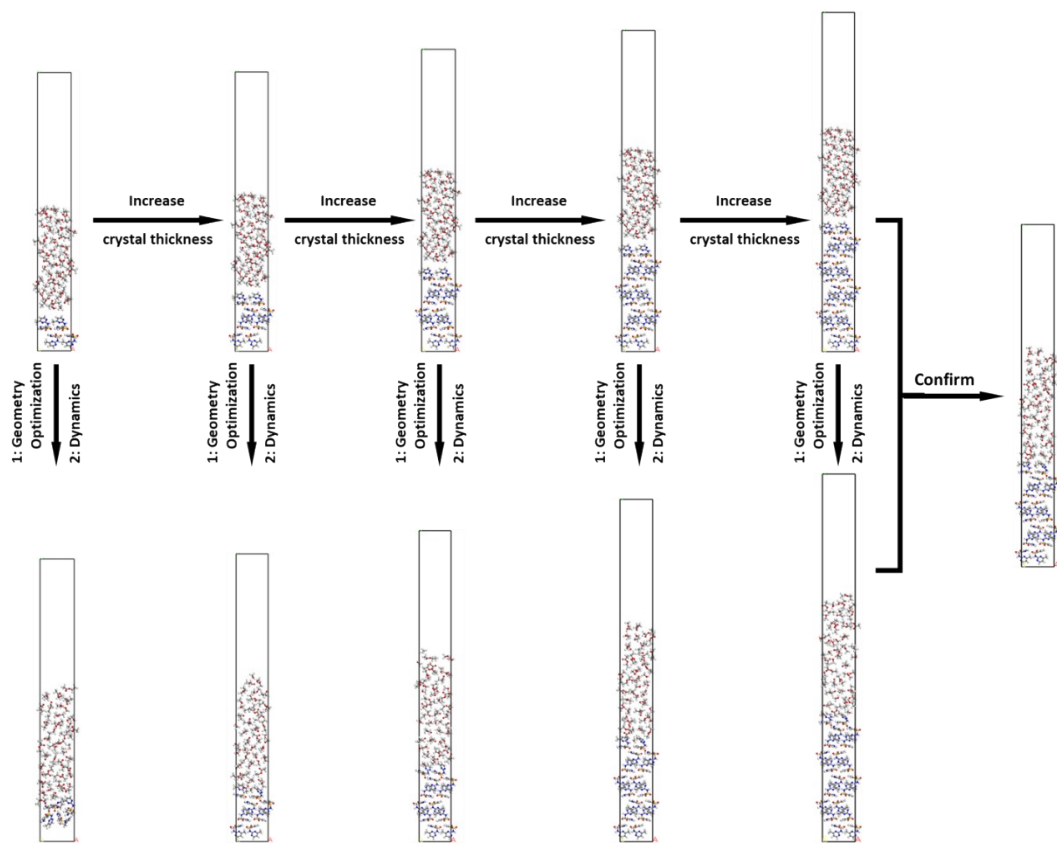

Fig. S5 Details of confirming the crystal thickness.

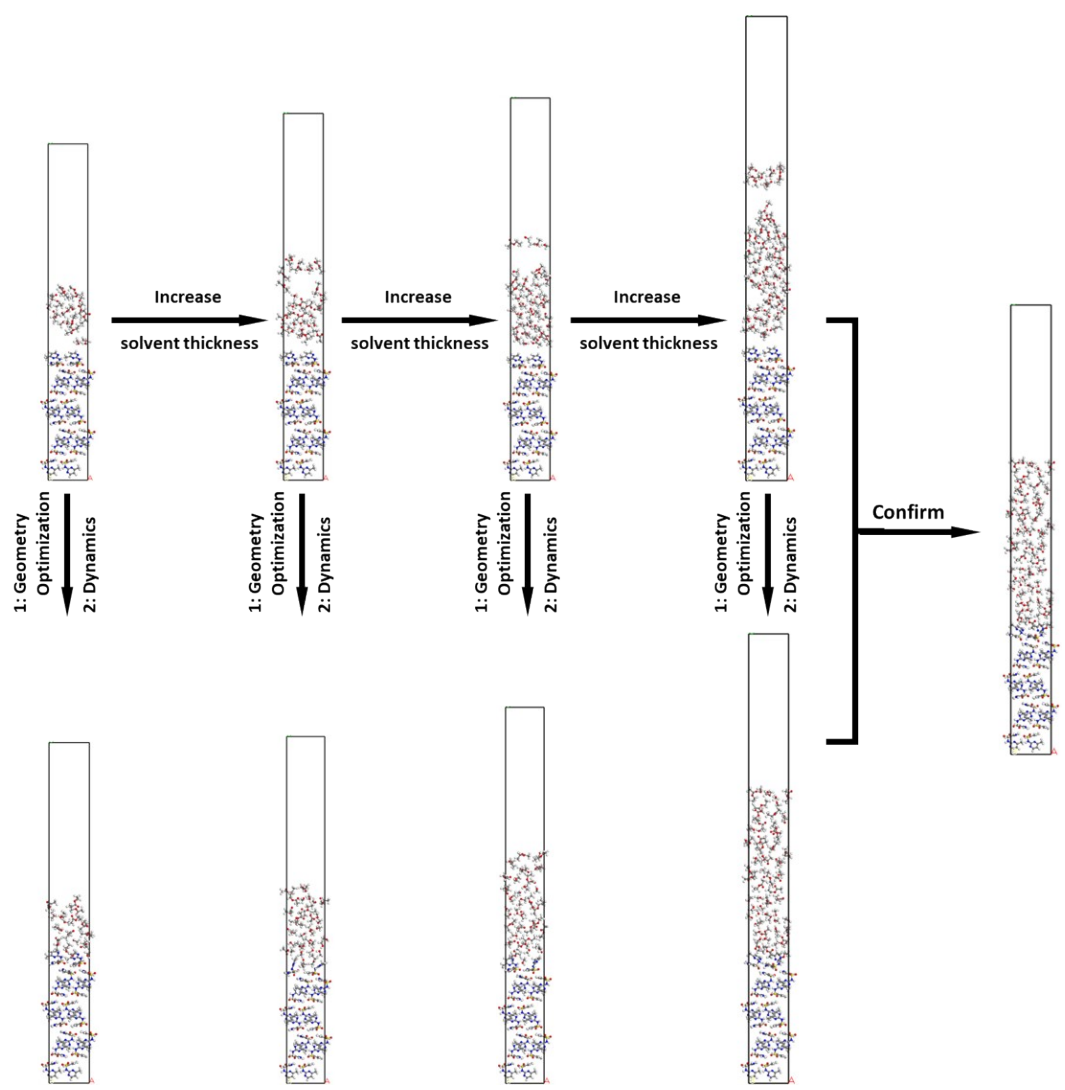

Fig. S6 Details of confirming the solvent thickness or the number of solvent molecules.



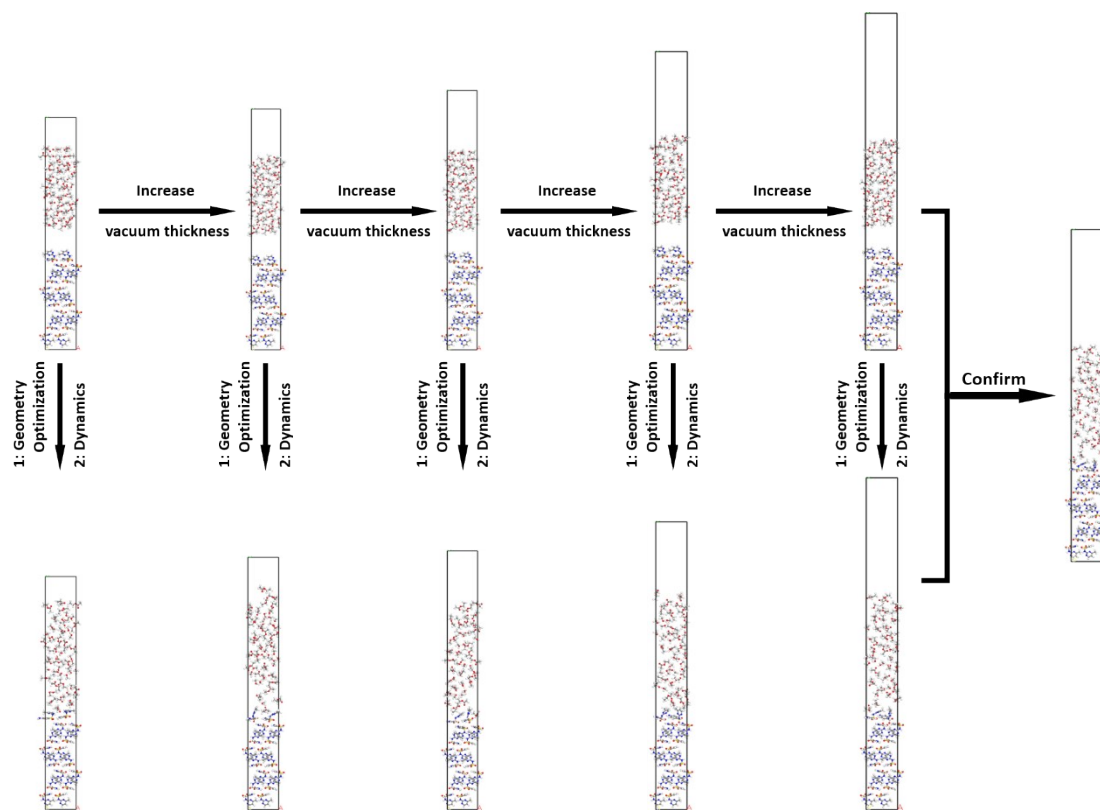

Fig. S7 Details of confirming the vacuum thickness.

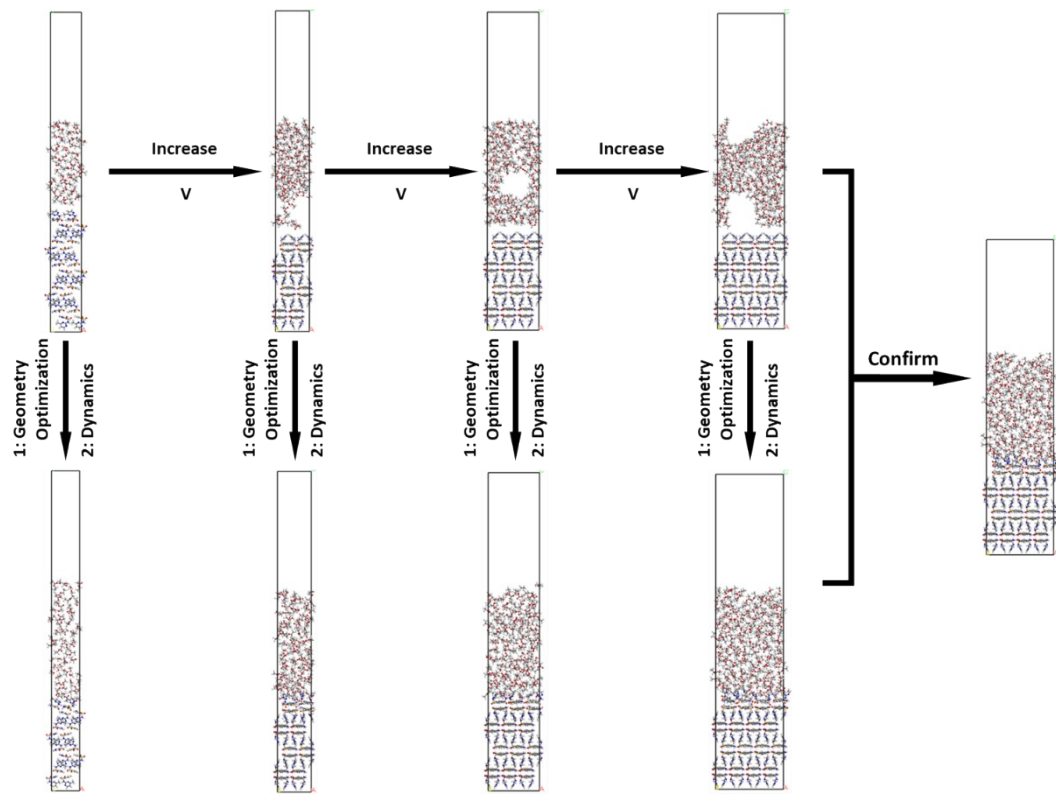

Fig. S8 Details of confirming the  $V$ .

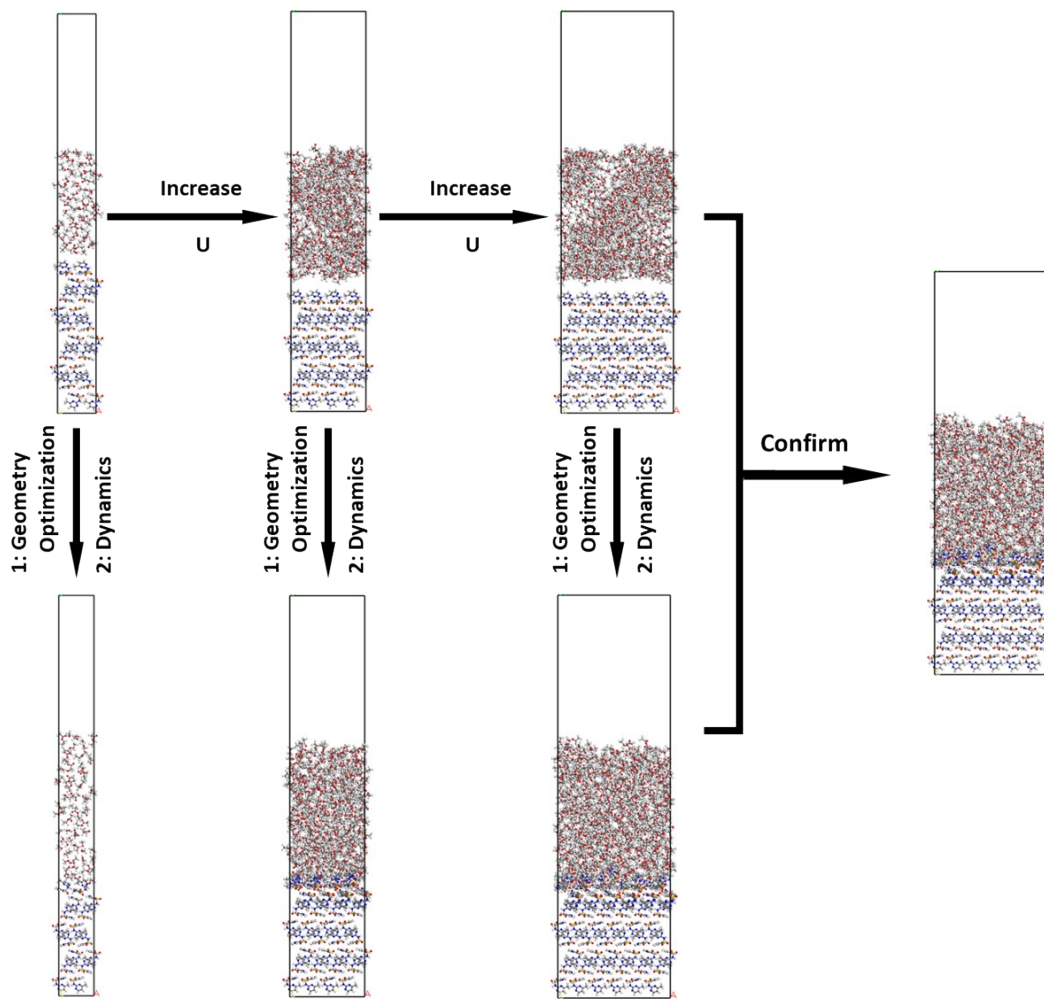

Fig. S9 Details of confirming the  $U$ .

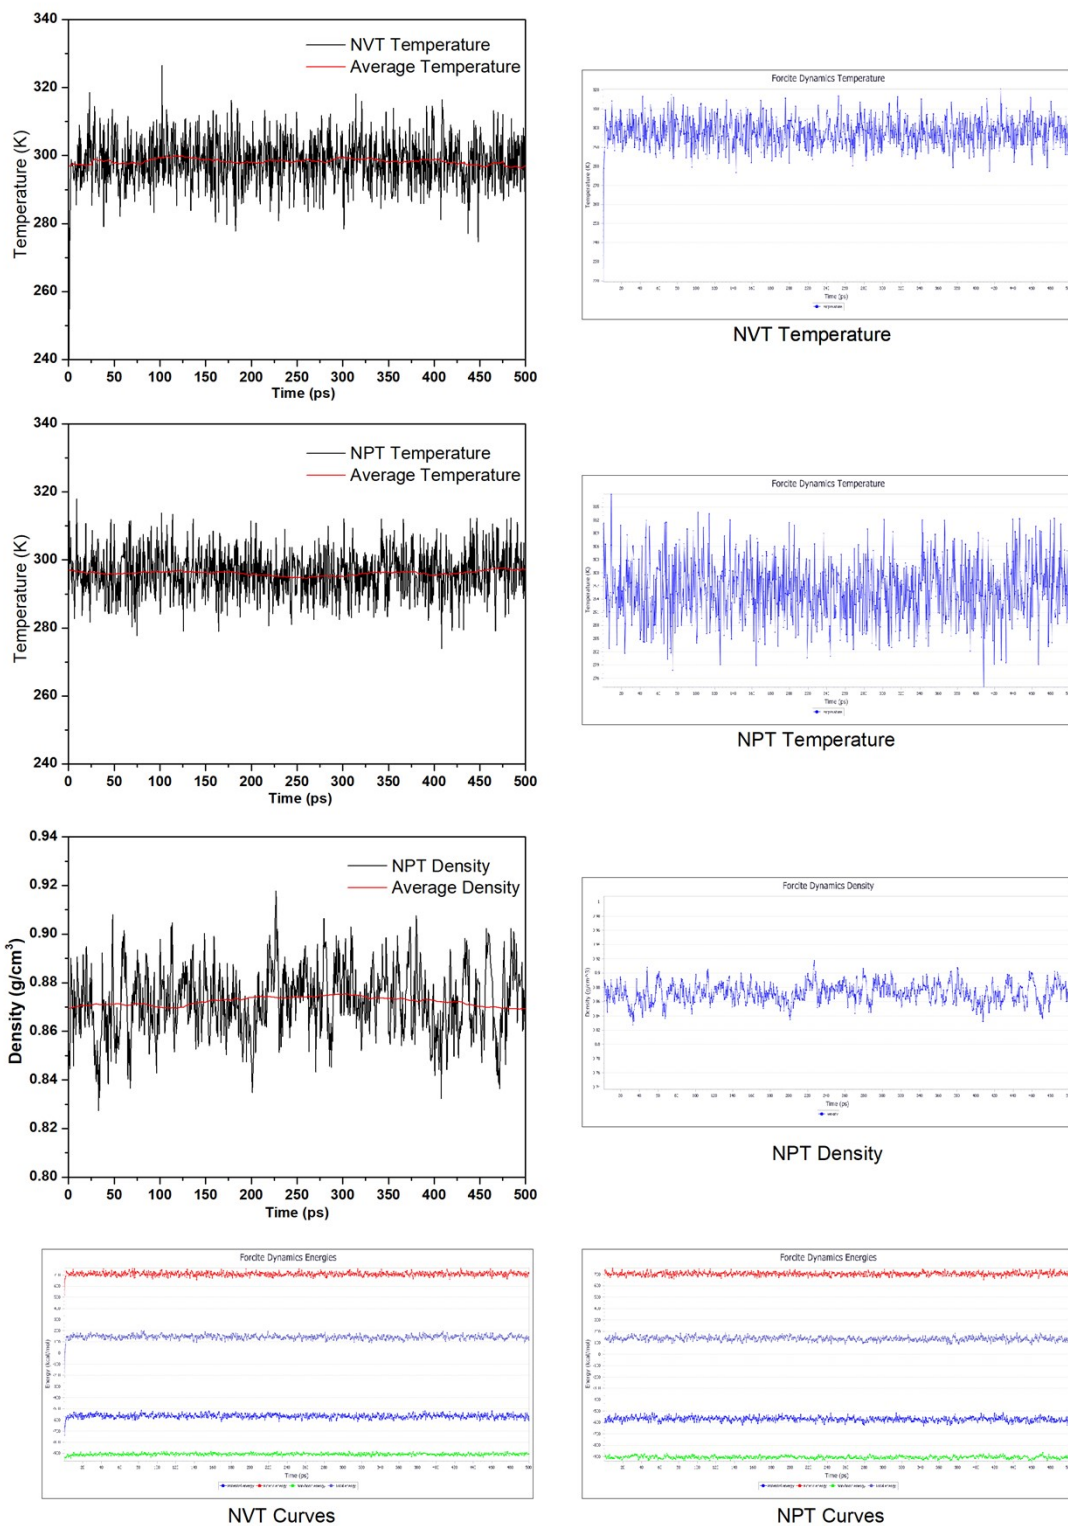

Fig. S10 The fluctuation curves of energy, temperature and density of amorphous cell and the crystal-solvent interface model performing on NPT and NVT ensemble, respectively.

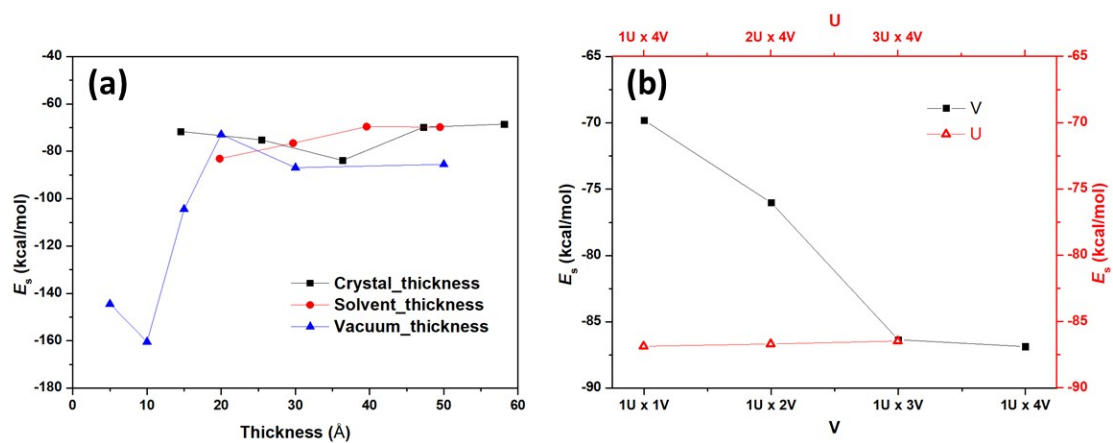

Fig. S11 The influence of model dimension on  $E_s$ .

Table S2 The determination of the model dimensions

| face  | Crystal          | Thickness                                    |                  |      |          |      |      |      |      | Vacuum     | U                | V                |
|-------|------------------|----------------------------------------------|------------------|------|----------|------|------|------|------|------------|------------------|------------------|
|       |                  | Solvent<br>(Number of the solvent molecules) |                  |      |          |      |      |      |      |            |                  |                  |
|       | Mix & Pure       | Mix                                          | H <sub>2</sub> O | MeOH | EtO<br>H | IPA  | MeAc | EtAc | BuAc | Mix & Pure | Mix & Pure       | Mix & Pure       |
| (001) | 4t<br>(47.2508Å) | 600                                          | 1320             | 960  | 600      | 600  | 480  | 360  | 360  | 50Å        | 3U<br>(43.4319Å) | 4V<br>(32.7480Å) |
| (011) | 4t<br>(36.5263Å) | 1200                                         | 4800             | 2400 | 1440     | 1440 | 1080 | 960  | 600  | 50Å        | 4U<br>(57.9092Å) | 3V<br>(69.8531Å) |
| (100) | 4t<br>(33.7756Å) | 750                                          | 3000             | 1500 | 1050     | 1050 | 750  | 600  | 450  | 50Å        | 5U<br>(40.9350Å) | 3V<br>(65.3928Å) |
| (110) | 4t<br>(34.4933Å) | 660                                          | 2400             | 1200 | 780      | 780  | 600  | 480  | 360  | 50Å        | 2U<br>(43.5929Å) | 3V<br>(49.8956Å) |
| (201) | 4t<br>(31.1143Å) | 600                                          | 2400             | 1200 | 780      | 780  | 600  | 480  | 360  | 50Å        | 1U<br>(45.9362Å) | 6V<br>(49.1220Å) |
| (111) | 5t<br>(39.0131Å) | 1560                                         | 5400             | 2400 | 1800     | 1800 | 1320 | 960  | 720  | 50Å        | 4U<br>(66.5275Å) | 3V<br>(69.8531Å) |
